# Supplementary material for: Possible beneficial association between renin-angiotensin-aldosterone-system blockade usage and graft prognosis in allograft IgA nephropathy: a retrospective cohort study
Source: PubMed Central journal article supplement (PMC6737644; doi:10.1186/s12882-019-1537-1), 2019-09-11
Supplement: 12882_2019_1537_MOESM2_ESM.pdf [file 12882_2019_1537_MOESM2_ESM.pdf]

**Figure S2. Presence of high-degree albuminuria ( $\geq 2+$ ) or high MAP ( $> 100$  mmHg) and their association with 5-year DCGF within patients those did not receive any antihypertensive agents.**

DCGF of patients with anti-hypertensive medications

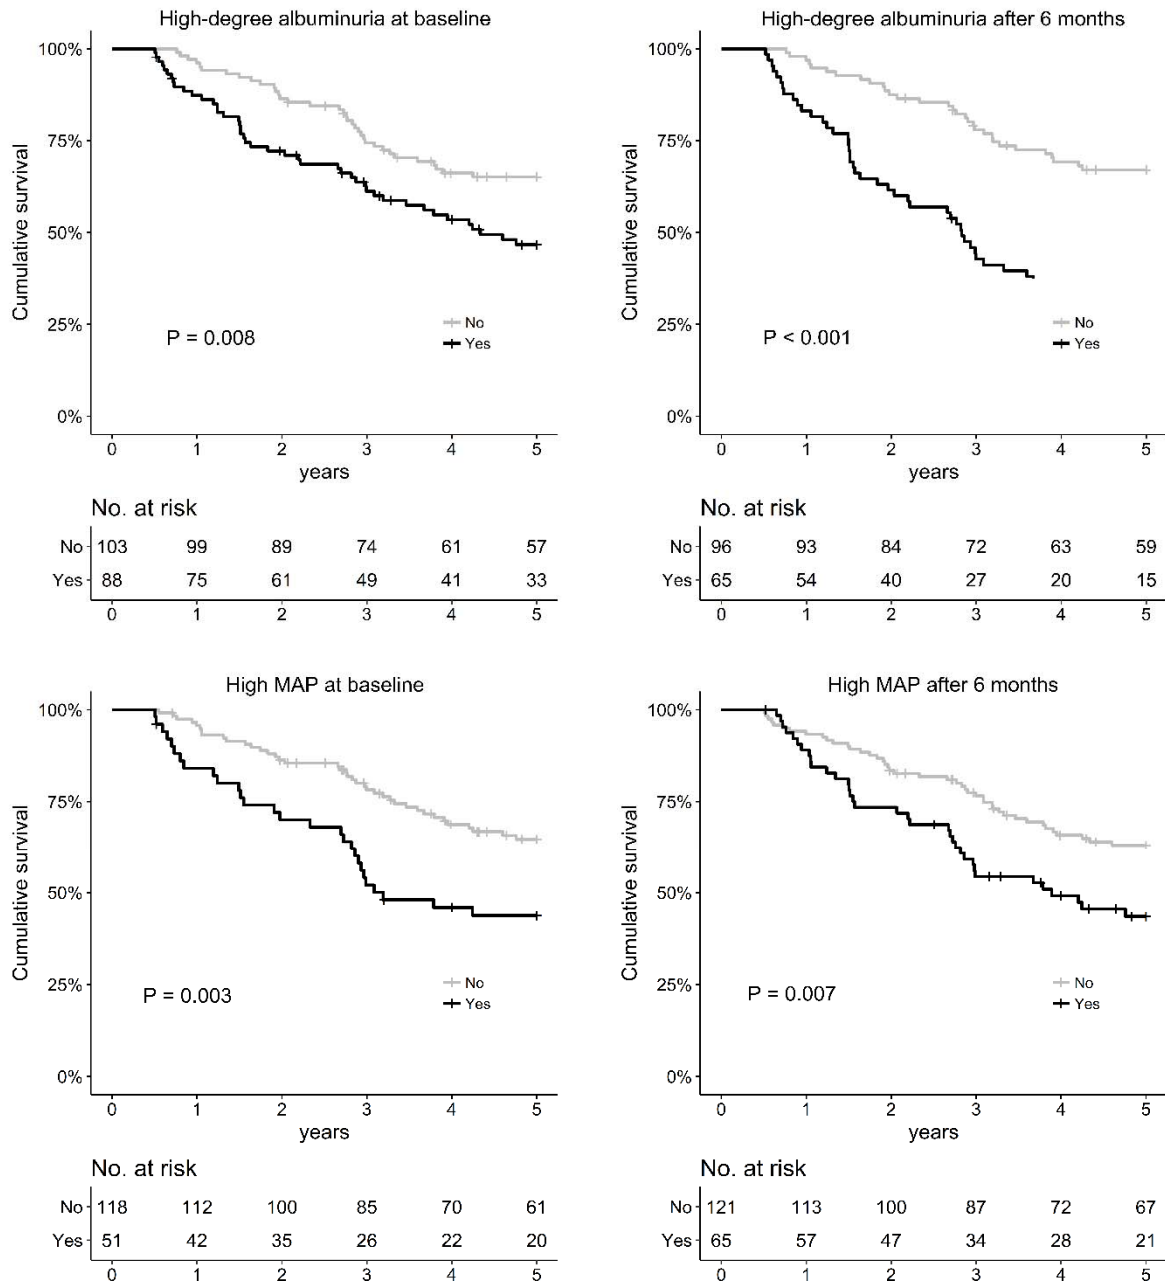

The variables at baseline and after 6 months from diagnosis are separately investigated. The x-axes indicate the years from allograft IgAN diagnosis and the y-axes indicate the cumulative survival.
