# Supplementary material for: Possible beneficial association between renin-angiotensin-aldosterone-system blockade usage and graft prognosis in allograft IgA nephropathy: a retrospective cohort study
Source: PubMed Central journal article supplement (PMC6737644; doi:10.1186/s12882-019-1537-1), 2019-09-11
Supplement: 12882_2019_1537_MOESM3_ESM.pdf [file 12882_2019_1537_MOESM3_ESM.pdf]

Figure S3. 5-year DCGF according to usage of RAASB within the combination group.

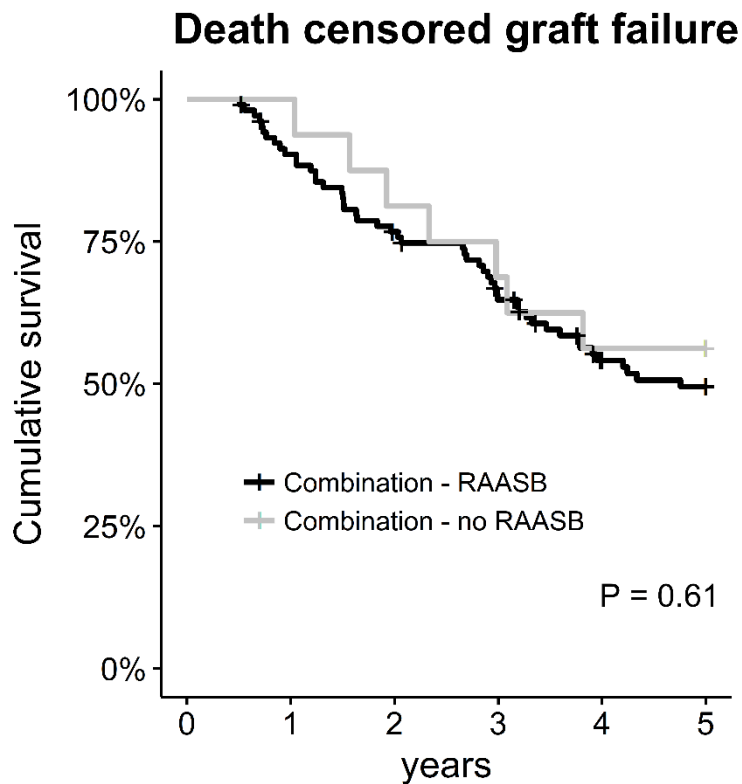

No. at risk

|          |     |    |    |    |    |    |
|----------|-----|----|----|----|----|----|
| RAASB    | 105 | 93 | 78 | 64 | 48 | 43 |
| no RAASB | 16  | 16 | 13 | 11 | 9  | 9  |
|          | 0   | 1  | 2  | 3  | 4  | 5  |

The x-axis indicates the time (years) from allograft IgAN diagnosis and the y-axis indicates the cumulative survival.
