# Supplementary material for: Possible beneficial association between renin-angiotensin-aldosterone-system blockade usage and graft prognosis in allograft IgA nephropathy: a retrospective cohort study
Source: PubMed Central journal article supplement (PMC6737644; doi:10.1186/s12882-019-1537-1), 2019-09-11
Supplement: 12882_2019_1537_MOESM4_ESM.pdf [file 12882_2019_1537_MOESM4_ESM.pdf]

**Figure S4. 5-year DCGF according to presence of a high-degree ( $\geq 2+$ ) albuminuria at baseline or after 6 months from allograft IgAN diagnosis within the single RAASB group.**

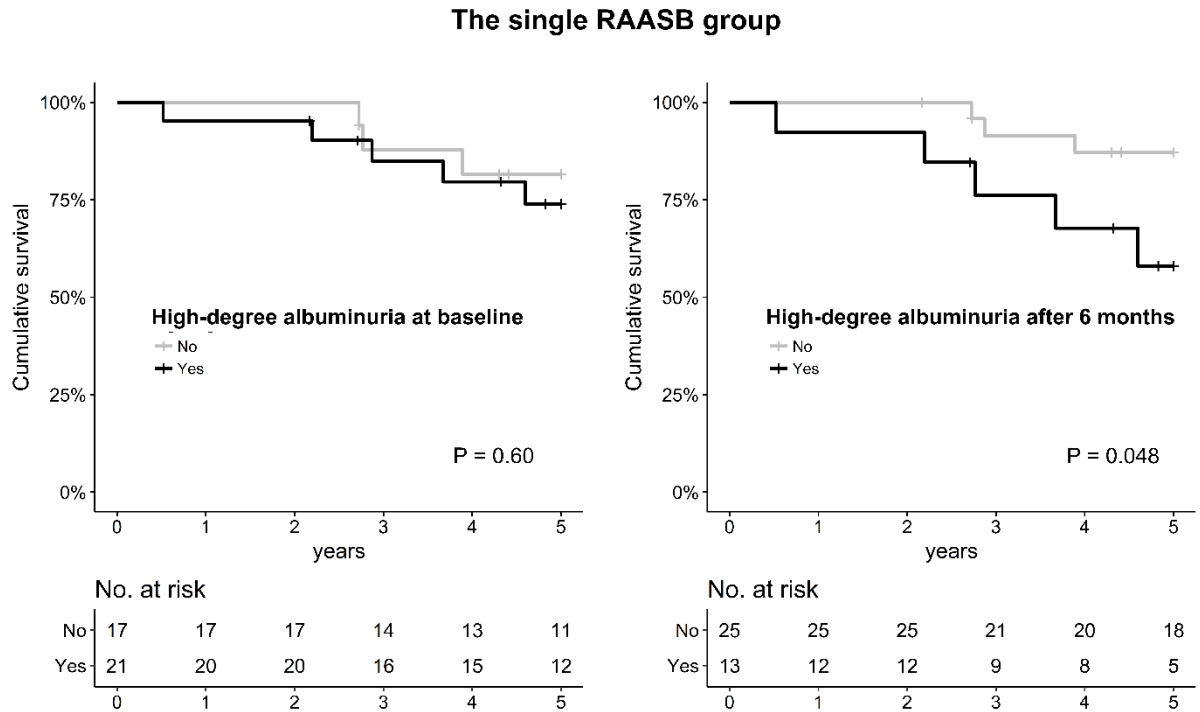

The x-axes indicated the time (years) from allograft IgAN diagnosis and the y-axes indicated the cumulative survival.
